# Supplementary material for: Flickering Emergences: The Question of Locality in Information-Theoretic Approaches to Emergence
Source: MDPI journal article supplement (doi:10.3390/e25010054), 2022-12-28
Supplement: s1 [file s1]

# Supplementary material for “Flickering emergences”

Thomas F. Varley<sup>1,2</sup>

<sup>1</sup> Department of Psychological and Brain Sciences, Indiana University Bloomington,

Bloomington, IN 47405, USA

<sup>2</sup> School of Informatics, Computing, & Engineering, Indiana University Bloomington,

Bloomington, IN 47405, USA

## Supplementary Figure

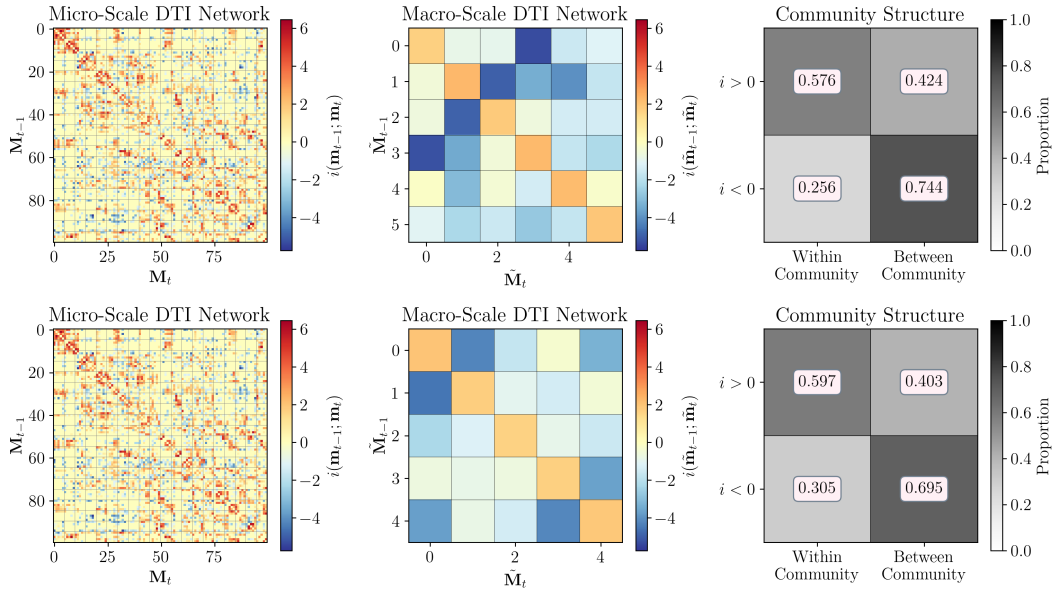

**Figure S1: Replicating the network emergence results using community-detection algorithms not based on random walkers. Top: Spinglass [1, 2], Bottom: Leading eigenvector community detection.**

## References

- [1] Jörg Reichardt and Stefan Bornholdt. Statistical mechanics of community detection. Physical Review E, 74(1):016110, July 2006. Publisher: American Physical Society.
- [2] V. A. Traag and Jeroen Bruggeman. Community detection in networks with positive and negative links. Physical Review E, 80(3):036115, September 2009. Publisher: American Physical Society.
